# Supplementary material for: Long-Term and Recent Progress in Blood Pressure Levels Among U.S. Adults With Diagnosed Diabetes, 1988–2008
Source: PubMed Central journal article supplement — Diabetes Care. 2011 Jun 17;34(7):1579–81. doi: 10.2337/dc11-0178 (PMC3120172; doi:10.2337/dc11-0178), 2011-06-17
Supplement: supp_dc11-0178_Supplementary_Data.pdf [file supp_dc11-0178_Supplementary_Data.pdf]

SUPPLEMENTARY DATA

**Supplementary Table 1. Changes in Blood Pressure Levels among US Adults with Diabetes, 1988-1994 vs. 2001-2008**

|                   | Sample size |           | Mean DBP (se) <sup>*</sup> |                         | Mean SBP(se) <sup>†</sup> |                          | % with BP<140/90 (se) |                         |
|-------------------|-------------|-----------|----------------------------|-------------------------|---------------------------|--------------------------|-----------------------|-------------------------|
|                   | 1988-1994   | 2001-2008 | 1988-1994                  | 2001-2008               | 1988-1994                 | 2001-2008                | 1988-1994             | 2001-2008               |
| Age (years)       |             |           |                            |                         |                           |                          |                       |                         |
| 20-44             | 154         | 233       | 76.2 (0.7)                 | 74.2 (0.9)              | 118.6 (1.2)               | 121.4 (1.0)              | 92.2 (3.3)            | 85.7 (2.4)              |
| 45-64             | 450         | 840       | 74.3 (0.9)                 | 72.2 (0.6) <sup>‡</sup> | 132.9 (1.4)               | 128.8 (0.9) <sup>‡</sup> | 64.5 (3.0)            | 73.6 (2.0) <sup>‡</sup> |
| 65+               | 610         | 968       | 68.3 (0.7)                 | 62.1 (0.6) <sup>‡</sup> | 143.4 (1.8)               | 138.6 (1.0) <sup>‡</sup> | 51.4 (2.7)            | 57.2 (1.9)              |
| Age-adjusted      |             |           |                            |                         |                           |                          |                       |                         |
| Total             | 1214        | 2041      | 72.3 (0.5)                 | 68.6 (0.5) <sup>‡</sup> | 134.7 (1.0)               | 131.4 (0.6) <sup>‡</sup> | 63.8 (1.7)            | 69.2 (1.2) <sup>‡</sup> |
| Men               | 528         | 1011      | 75.0 (0.7)                 | 70.7 (0.6) <sup>‡</sup> | 132.1 (1.0)               | 129.4 (0.7) <sup>‡</sup> | 69.6 (2.3)            | 72.1 (1.9)              |
| Women             | 686         | 1030      | 69.9 (0.6)                 | 66.7 (0.6) <sup>‡</sup> | 136.7 (1.6)               | 133.1 (0.8) <sup>§</sup> | 59.1 (2.6)            | 67.0 (1.3) <sup>‡</sup> |
| NH-whites         | 455         | 829       | 71.8 (0.6)                 | 68.1 (0.6) <sup>‡</sup> | 133.9 (1.3)               | 130.2 (0.8) <sup>‡</sup> | 66.2 (2.1)            | 71.2 (1.7)              |
| NH-blacks         | 340         | 544       | 74.3 (0.9)                 | 70.0 (0.9) <sup>‡</sup> | 138.3 (1.2)               | 134.8 (1.0) <sup>‡</sup> | 52.4 (3.1)            | 62.0 (2.0) <sup>‡</sup> |
| Mexican Americans | 384         | 467       | 73.0 (0.7)                 | 68.4 (0.8) <sup>‡</sup> | 136.6 (1.0)               | 132.2 (1.4) <sup>‡</sup> | 58.4 (2.2)            | 67.8 (2.6) <sup>‡</sup> |

Data were age-adjusted to NHANES 2005-2008 diabetic population.

<sup>\*</sup> diastolic blood pressure (standard error).

<sup>†</sup> systolic blood pressure (standard error).

<sup>‡</sup> p<0.05 for comparison between the two time periods.

<sup>§</sup> p =0.0501

SUPPLEMENTARY DATA

**Supplementary Table 2. Prevalence of Hypertension, Awareness, Treatment, and Control among Adults with Diabetes and Hypertension, 1988-1994 vs. 2001-2008**

|                   | Prevalence %(se) |                         | Among adults with hypertension |                         |                  |                         |                |                         |
|-------------------|------------------|-------------------------|--------------------------------|-------------------------|------------------|-------------------------|----------------|-------------------------|
|                   |                  |                         | Awareness %(se)                |                         | Treatment % (se) |                         | Control % (se) |                         |
|                   | 1988-1994        | 2001-2008               | 1988-1994                      | 2001-2008               | 1988-1994        | 2001-2008               | 1988-1994      | 2001-2008               |
| Age (years)       |                  |                         |                                |                         |                  |                         |                |                         |
| 20-44             | 24.8 (4.5)       | 35.2 (3.7)              | 92.1 (3.5)                     | 86.3 (4.2)              | 91.3 (3.6)       | 81.6 (4.4)              | 68.4 (13.6)    | 56.2 (5.8)              |
| 45-64             | 56.4 (3.8)       | 66.0 (2.4) <sup>‡</sup> | 87.2 (3.1)                     | 95.4 (0.9) <sup>‡</sup> | 74.9 (3.6)       | 90.0 (1.3) <sup>‡</sup> | 36.6 (3.8)     | 58.9 (2.7) <sup>‡</sup> |
| 65+               | 68.0 (2.6)       | 81.6 (1.5) <sup>‡</sup> | 77.0 (3.1)                     | 91.0 (1.4) <sup>‡</sup> | 68.6 (3.4)       | 89.3 (1.5) <sup>‡</sup> | 27.8 (3.6)     | 47.1 (2.3) <sup>‡</sup> |
| Age-adjusted      |                  |                         |                                |                         |                  |                         |                |                         |
| Total             | 56.0 (2.1)       | 67.3 (1.4) <sup>‡</sup> | 84.1 (2.0)                     | 92.3 (1.0) <sup>‡</sup> | 75.0 (2.2)       | 88.4 (1.2) <sup>‡</sup> | 38.1 (3.4)     | 54.0 (1.8) <sup>‡</sup> |
| Men               | 45.8 (3.1)       | 63.6 (2.0) <sup>‡</sup> | 82.9 (2.5)                     | 90.6 (1.4) <sup>‡</sup> | 73.0 (3.6)       | 86.1 (1.7) <sup>‡</sup> | 35.3 (5.3)     | 54.5 (2.8) <sup>‡</sup> |
| Women             | 64.3 (3.1)       | 70.3 (1.6)              | 84.6 (2.5)                     | 94.0 (1.0) <sup>‡</sup> | 76.0 (3.0)       | 90.7 (1.3) <sup>‡</sup> | 40.0 (3.6)     | 54.4 (2.2) <sup>‡</sup> |
| NH-whites         | 53.9 (2.8)       | 66.6 (1.7) <sup>‡</sup> | 84.2 (2.6)                     | 93.3 (1.5) <sup>‡</sup> | 76.1 (3.0)       | 89.8 (1.7) <sup>‡</sup> | 42.7 (3.8)     | 57.8 (2.6) <sup>‡</sup> |
| NH-blacks         | 68.7 (2.7)       | 79.4 (2.0) <sup>‡</sup> | 84.1 (2.3)                     | 94.6 (1.3) <sup>‡</sup> | 74.0 (3.2)       | 90.6 (1.7) <sup>‡</sup> | 31.2 (3.2)     | 50.3 (2.5) <sup>‡</sup> |
| Mexican Americans | 55.4 (3.4)       | 61.4 (3.0)              | 74.1 (4.5)                     | 82.8 (2.3)              | 57.5 (3.9)       | 75.9 (2.1) <sup>‡</sup> | 21.5 (3.0)     | 45.9 (2.9) <sup>‡</sup> |

Data were age-adjusted to NHANES 2005-2008 diabetic population.

Abbreviation: se, standard error.

<sup>‡</sup>: p<0.05 for comparisons between the two time periods

SUPPLEMENTARY DATA

**Supplementary Table 3. Changes in Blood Pressure Levels among US Adults with Diabetes, 2001-2004 vs. 2005-2008**

|                   | Sample size |           | Mean DBP(se) <sup>*</sup> |            | Mean SBP(se) <sup>†</sup> |             | % with BP<140/90 (se) |            |
|-------------------|-------------|-----------|---------------------------|------------|---------------------------|-------------|-----------------------|------------|
|                   | 2001-2004   | 2005-2008 | 2001-2004                 | 2005-2008  | 2001-2004                 | 2005-2008   | 2001-2004             | 2005-2008  |
| Age (years)       |             |           |                           |            |                           |             |                       |            |
| 20-44             | 109         | 124       | 72.7 (1.3)                | 75.7 (1.2) | 121.5 (1.5)               | 121.3 (1.4) | 89.0 (2.5)            | 82.7 (3.8) |
| 45-64             | 341         | 499       | 72.9 (1.0)                | 71.6 (0.7) | 129.9 (1.4)               | 128.0 (1.1) | 72.6 (3.1)            | 74.3 (2.5) |
| 65+               | 444         | 524       | 61.0 (0.8)                | 62.9 (0.9) | 137.9 (1.6)               | 139.2 (1.2) | 58.3 (3.2)            | 56.3 (2.1) |
| Age-adjusted      |             |           |                           |            |                           |             |                       |            |
| Total             | 894         | 1147      | 68.3 (0.7)                | 68.9 (0.6) | 131.7 (0.9)               | 131.3 (0.7) | 69.7 (1.9)            | 68.7 (1.5) |
| Men               | 455         | 556       | 70.3 (0.8)                | 71.1 (0.9) | 128.8 (1.1)               | 130.0 (0.9) | 74.3 (2.8)            | 69.7 (2.6) |
| Women             | 439         | 591       | 66.4 (1.0)                | 67.0 (0.6) | 134.2 (1.4)               | 132.2 (1.0) | 65.7 (2.3)            | 68.0 (1.6) |
| NH-whites         | 377         | 452       | 67.4 (0.9)                | 68.7 (0.8) | 129.7 (1.2)               | 130.7 (1.0) | 72.1 (2.4)            | 70.5 (2.3) |
| NH-blacks         | 197         | 347       | 70.9 (1.4)                | 69.4 (1.1) | 136.9 (1.6)               | 133.4 (1.1) | 59.3 (3.2)            | 63.4 (2.4) |
| Mexican Americans | 249         | 218       | 68.9 (0.9)                | 68.0 (1.2) | 133.0 (1.0)               | 131.5 (2.4) | 66.5 (2.5)            | 68.5 (4.4) |

Data were age-adjusted to NHANES 2005-2008 diabetic population.

\* diastolic blood pressure (standard error)

† systolic blood pressure (standard error)

All P>0.05 for comparisons between the two time periods

SUPPLEMENTARY DATA

**Supplementary Table 4. Prevalence of Hypertension, Awareness, Treatment, and Control among Adults with Diabetes and Hypertension, 2001-2004 vs. 2005-2008**

|                   | Prevalence %(se) |                         | Among adults with hypertension |            |                  |            |                |            |
|-------------------|------------------|-------------------------|--------------------------------|------------|------------------|------------|----------------|------------|
|                   |                  |                         | Awareness %(se)                |            | Treatment % (se) |            | Control % (se) |            |
|                   | 2001-2004        | 2005-2008               | 2001-2004                      | 2005-2008  | 2001-2004        | 2005-2008  | 2001-2004      | 2005-2008  |
| Age (years)       |                  |                         |                                |            |                  |            |                |            |
| 20-44             | 27.2 (4.2)       | 42.8 (5.4) <sup>‡</sup> | 94.4 (3.3)                     | 81.5 (6.3) | 90.3 (4.3)       | 76.4 (6.4) | 53.4 (9.5)     | 57.7 (7.3) |
| 45-64             | 66.9 (3.9)       | 65.4 (2.9)              | 94.5 (1.4)                     | 96.0 (1.0) | 89.5 (2.0)       | 90.3 (1.6) | 57.6 (4.3)     | 59.8 (3.6) |
| 65+               | 82.9 (2.1)       | 80.5 (2.2)              | 91.2 (1.9)                     | 90.8 (1.9) | 89.3 (2.2)       | 89.2 (2.1) | 49.1 (3.6)     | 45.4 (2.9) |
| Age-adjusted      |                  |                         |                                |            |                  |            |                |            |
| Total             | 66.9 (2.0)       | 67.7 (1.8)              | 93.2 (1.2)                     | 91.8 (1.5) | 89.6 (1.8)       | 87.8 (1.7) | 53.7 (2.7)     | 54.0 (2.3) |
| Men               | 61.4 (2.8)       | 66.1 (2.9)              | 92.1 (2.1)                     | 90.0 (1.8) | 87.7 (2.7)       | 85.4 (2.1) | 56.6 (5.0)     | 53.4 (3.4) |
| Women             | 72.1 (2.4)       | 69.0 (2.1)              | 94.2 (1.2)                     | 93.8 (1.5) | 91.1 (1.6)       | 90.4 (2.0) | 51.9 (2.9)     | 56.4 (3.1) |
| NH-whites         | 65.7 (2.3)       | 67.4 (2.4)              | 94.9 (1.1)                     | 93.0 (2.0) | 90.8 (1.7)       | 89.9 (2.2) | 57.6 (4.5)     | 57.6 (3.4) |
| NH-blacks         | 80.3 (3.3)       | 78.9 (2.4)              | 94.8 (1.6)                     | 94.3 (2.0) | 91.8 (2.1)       | 89.6 (2.6) | 47.7 (4.1)     | 51.8 (3.2) |
| Mexican Americans | 61.9 (2.9)       | 61.0 (4.9)              | 84.8 (3.2)                     | 81.2 (3.3) | 80.5 (3.7)       | 72.1 (2.4) | 46.6 (4.8)     | 44.6 (3.8) |

Data were age-adjusted to NHANES 2005-2008 diabetic population.

Abbreviation: se, standard error.

<sup>‡</sup>: p=0.02.

For all others, p>0.05.
